# Supplementary material for: Catalytic hydrodeoxygenation of anisole: an insight into the role of metals in transalkylation reactions in bio-oil upgrading
Source: Royal Society of Chemistry journal article supplement (doi:10.1039/c6gc03198f), 2017-01-01
Supplement: c6gc03198f1.pdf [file c6gc03198f1.pdf]

## Catalytic hydrodeoxygenation of anisole: an insight into the role of metals on transalkylation reactions in bio-oil upgrading

Hongliang Wang,<sup>a</sup> Maoqi Feng<sup>b</sup> and Bin Yang<sup>a</sup>

<sup>a</sup> *Bioproducts, Sciences, and Engineering Laboratory, Department of Biological Systems Engineering, Washington State University, Richland, WA 99354, USA.*

<sup>b</sup> *Chemistry & Chemical Engineering Division, Southwest Research Institute, San Antonio, TX 78238, USA.*

### 1. Materials

All chemicals used, including anisole, phenol, toluene, benzene, were bought from Fisher Scientific. Commercial benchmark catalysts NiMo/Al<sub>2</sub>O<sub>3</sub> was purchased from Alfa Aesar. The Ni and Mo loadings on NiMo/Al<sub>2</sub>O<sub>3</sub> are 4.2 wt.% and 11.4 wt.%, respectively. The catalyst was activated by flowing dimethyl disulfide in toluene (3%) with hydrogen to the reactor for 3 hours. MoP/Al<sub>2</sub>O<sub>3</sub> [1] and Ru/Al<sub>2</sub>O<sub>3</sub> [2] were synthesized in the lab using the literature methods. Ru loadings on Ru/Al<sub>2</sub>O<sub>3</sub> is 6 wt%. MoP catalyst was prepared by incipient wetness impregnation of Al<sub>2</sub>O<sub>3</sub> support using equimolar Mo and P solutions formed from ammonium paramolybdate tetrahydrate, (NH<sub>4</sub>)<sub>6</sub>Mo<sub>7</sub>O<sub>24</sub>·4H<sub>2</sub>O, and ammonium phosphate, (NH<sub>4</sub>)<sub>2</sub>HPO<sub>4</sub>. Quantity was adjusted to obtain loading of Mo of 13 wt % (1.04 mmol/g). The impregnated support was calcined in air at 500°C for 6 h. The resulting solids was activated by hydrogen in the reactor before use.

### 2. Catalytic experiments

The catalytic experiments were carried out by using a 1/2-inch O.D., 24-inch long, 316L stainless tubular reactor at about 20 psig hydrogen pressure. In each run, the catalyst sample (10 g, 20 mesh) was packed in the reactor between two layers of quartz wool. The reactor was stationed in a temperature-programmed furnace. A 3/8-inch O.D., 16-inch long, tubular stainless-steel reactor was used as a preheater which was equipped with a temperature controller. At the beginning of the experiment, the temperature of the reactor was increased at 20°C/min and held at the desired value for 0.5 h in flowing N<sub>2</sub> (100 mL/min) before reaction. When the temperature stabilized, 10 wt.% anisole or

phenol in toluene was fed by a high-pressure Eldex pump at a desired liquid flow rate and vaporized before entering the reactor. Gas flow was adjusted by a Rotameter. All pipelines were insulated to avoid condensation of either reactants or products.

### 3. Analysis and calculation methods

The effluent was trapped in a container placed in an ice-water bath, and analyzed by GC-FID and GC-MS (Shimadzu QP2010s) with the same polyethylene glycol column (50m x 200 μm x 40 μm). The GC and GC-MS analytical conditions are as follows: inlet: 225°C, Split Mode 200:1, 1 μL (neat) injection; oven: 50°C-5min, 15°C/min, 250°C. Phenol and hexamethylbenzene were used as external standards for phenolic products and alkybenzenes products, respectively. The conversion of reactants and the distribution of products were calculated based on the following methods.

$$\text{Conversion} = \frac{R_0 - R_1}{R_0} \times 100\%$$

R<sub>0</sub>=Reactant initially added,                      R<sub>1</sub>=Reactant remaindered

$$\text{Distribution } X = \frac{\text{Yield}_x}{\text{Total product yield}} \times 100\%$$

Yield  $x = 4 \times 10^{-8}A - 0.3502$  (X contain phenolic hydroxyl group, A=GC area, phenol was used as standard)

Yield  $x = 1 \times 10^{-8}A + 0.0004$  (X does not contain phenol hydroxyl group, A=GC area, Hexamethylbenzene was used as standard)

### 4. External standard curves

#### 4.1. Quantitative Analysis of phenol by GC

**Table s1.** GC Analysis of Different Standard Concentrations of Phenol

| <u>Area Counts</u> | <u>Phenol wt%</u> |
|--------------------|-------------------|
| 0                  | 0                 |
| 54033117.5         | 1.802             |
| 136836605          | 4.826             |
| 229002567.5        | 8.807             |
| 503932756.5        | 20.186            |

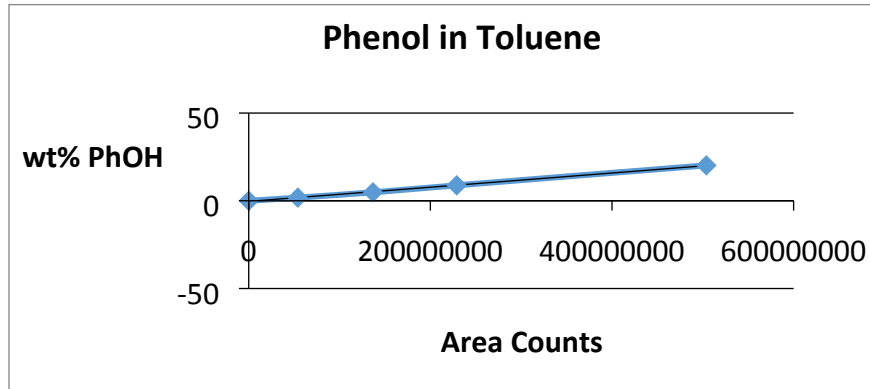

**Figure s1.** External standard curve of phenol

**4.2. Quantitative Analysis of Hexamethylbenzene by GC**

**Tables 2.** GC Analysis of Different Standard Concentrations of Hexamethylbenzene

| <u>Area Counts</u> | <u>Hexamethylbenzene wt%</u> |
|--------------------|------------------------------|
| 0                  | 0                            |
| 7657945            | 0.09                         |
| 15330304           | 0.19                         |
| 21640603           | 0.28                         |
| 45345956           | 0.56                         |
| 75730480           | 1.12                         |

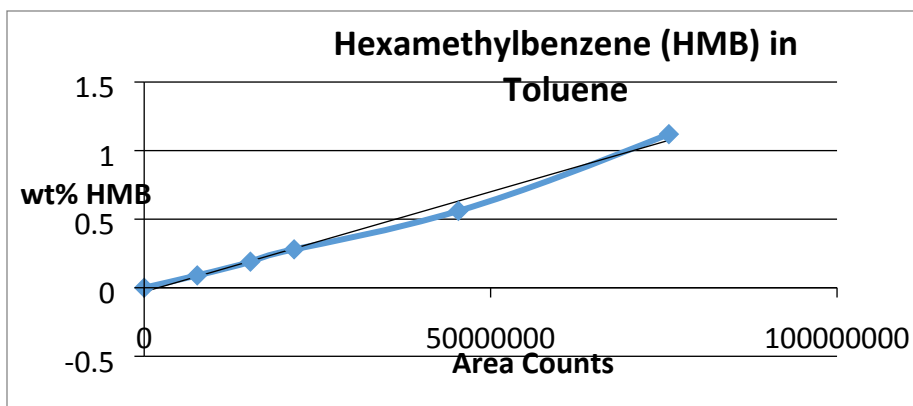

Figure s2. External standard curve of hexamethylbenzene

## References

(1) S. T. Oyama, P. Clark, V. L. S. Teixeira da Silva, E. J. Ledes, and F. G. Requejo, XAFS Characterization of Highly Active Alumina-Supported Molybdenum Phosphide Catalysts (MoP/Al<sub>2</sub>O<sub>3</sub>) for Hydrotreating, *J. Phys. Chem. B* 2001, **105**, 4961-4966.

(2) Vanina A. Mazzieri, Pablo C. L'Argentiere, Fernando Coloma-Pascual, and Nora S. Figoli, Effect of Chlorine on the Properties of Ru/Al<sub>2</sub>O<sub>3</sub>, *Ind. Eng. Chem. Res.* 2003, **42**, 2269-2272.
